# Supplementary material for: Analytic characterization of random errors in spectral dual-polarized cloud radar observations
Source: Copernicus journal article supplement (doi:10.5194/amt-15-1333-2022), 2022-03-14
Supplement: Supplementary file 1 [file amt-15-1333-2022-supplement.zip]

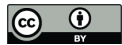

## *Supplement of*

# **Analytic characterization of random errors in spectral dual-polarized cloud radar observations**

**Alexander Myagkov and Davide Ori**

*Correspondence to:* Alexander Myagkov ([alexander.myagkov@radiometer-physics.de](mailto:alexander.myagkov@radiometer-physics.de))

- amt-15-1333-2022-supplement-title-page.pdf
- README.txt
- coh\_matrix\_in\_orthogonal\_basis\_from\_formulas.m
- filter\_coherent\_components.m
- generate\_figure\_2.m
- generate\_figure\_3\_a\_to\_d.m
- generate\_figure\_3\_e\_to\_h.m
- generate\_figure\_4.m
- generate\_figure\_5.m
- generate\_figure\_6.m
- get\_complex\_spectra.m
- get\_cov\_matrix\_c.m
- get\_cov\_matrix\_hv.m
- get\_covariance\_matrix\_zdr\_rho\_phi.m
- get\_covariance\_matrix\_elements.m
- get\_estimated\_error\_covariance\_matrix\_b.m
- get\_estimated\_error\_covariance\_matrix\_c.m
- get\_operator\_for\_sec\_specific\_basis.m
- get\_results\_for\_one\_element.m
- get\_simulated\_error\_covariance\_matrix\_b.m

- `get_simulated_error_covariance_matrix_c.m`
- `get_var_of_pol_var.m`
- `likelihood_bb.m`
- `likelihood_bc.m`
- `pdf_bb.m`
- `pdf_bc.m`
- `pdf_mul.m`
- `pdf_power.m`
- `read_first_seq_from_iq_file.m`

The copyright of individual parts of the supplement might differ from the article licence.
